# Supplementary material
Source: ML conference proceedings conference paper supplement (https://openaccess.thecvf.com/content/CVPR2026/html/Wang_Robust3DGSW_Toward_Robust_CVPR_2026_paper.html)
Supplement: Supplementary file 1 [file Wang_Robust3DGSW_Toward_Robust_CVPR_2026_supplemental.pdf]

# Robust3DGSW: Toward Robust Watermarking for Quantization-Aware 3D Gaussian Splatting

## Supplementary Material

### A. Ablation Study

#### A.1. Ablation on Frequency Band Selection

To validate our design choice of mid-frequency band embedding, we compared various frequency band selections for watermark embedding in the 3D Gaussian position domain. Table 2 shows the results using 4-bit quantization.

Table 2. Ablation study on frequency band selection for 3D Gaussian watermark embedding under 4-bit quantization.

| Band                            | PSNR(dB)     | SSIM        | LPIPS       | Acc(%)       |
|---------------------------------|--------------|-------------|-------------|--------------|
| Low-frequency [0, 1/8]          | 14.82        | 0.73        | 0.28        | 69.74        |
| High-frequency [3/8, 1/2]       | 18.27        | 0.82        | 0.19        | 56.32        |
| Full-frequency [0, 1/2]         | 13.95        | 0.71        | 0.31        | 71.85        |
| <b>Mid-frequency [1/8, 3/8]</b> | <b>20.46</b> | <b>0.88</b> | <b>0.12</b> | <b>87.51</b> |

As indicated in Table 2, the mid-frequency band offers an optimal balance between rendering quality and watermark robustness. Low-frequency embedding alters DC components and coarse structures, leading to significant visual distortions (PSNR: 14.82 dB) that negatively impact perceptual quality. In contrast, high-frequency embedding achieves better image quality (PSNR of 18.27 dB) but struggles with weak watermark extraction (accuracy of 56.32%), primarily due to 4-bit quantization, which often eliminates high-frequency information through rounding errors. Full-frequency embedding combines the drawbacks of both low- and high-frequency approaches, resulting in the lowest PSNR of 13.95 dB. In comparison, our selection of mid-frequency band embedding effectively addresses quantization-induced signal loss and reduces the negative effects of watermarks on rendered images. This confirms the validity of our choice of the frequency-band watermark embedding method, as discussed in Section 3.2.

#### A.2. Ablation on embedding hyperparameters

Table 3. Ablation study on watermark embedding hyperparameters under 4-bit quantization.

| $\alpha_{3D} / \alpha_{2D}$ | PSNR(dB)     | SSIM        | LPIPS       | Acc(%)       |
|-----------------------------|--------------|-------------|-------------|--------------|
| 0.5 / 0.5                   | 24.53        | 0.93        | 0.07        | 72.18        |
| 0.75 / 0.75                 | 22.41        | 0.91        | 0.09        | 81.34        |
| <b>1.0 / 1.0 (Default)</b>  | <b>20.46</b> | <b>0.88</b> | <b>0.12</b> | <b>87.51</b> |
| 1.5 / 1.5                   | 16.23        | 0.82        | 0.19        | 91.27        |
| 2.0 / 2.0                   | 12.84        | 0.74        | 0.28        | 93.42        |

We investigated how the hyperparameters for watermark embedding affect the trade-off between image quality and watermark extraction accuracy. We follow the setup described in [9], where we set  $\alpha_{3D} = \alpha_{2D}$ . Table 3 presents

the results for 4-bit quantization with varying hyperparameter values. When  $\alpha_{3D} = \alpha_{2D} = 0.5$ , the Peak Signal-to-Noise Ratio (PSNR) is 24.53 dB, which indicates good rendering quality. However, the weak watermark embedding in this configuration leads to an extraction accuracy of only 72.18%. In contrast, setting  $\alpha_{3D} = \alpha_{2D} = 2.0$  increases extraction accuracy to 93.42%, but at a cost: visual quality deteriorates greatly, yielding a PSNR of just 12.84 dB.

#### A.3. Performance under Quantization

To evaluate the effectiveness of Robust3DGSW at different quantization levels, we also assessed its performance with 16-bit and 8-bit quantization. As shown in Tables 4 and 5, Robust3DGSW consistently demonstrates superior performance, underscoring its robustness.

Table 4. Performance comparison (with 16-bit quantization).

| Methods                   | No Distortion |              |              |              | Distortions (Bit Accuracy %) |              |              |              |
|---------------------------|---------------|--------------|--------------|--------------|------------------------------|--------------|--------------|--------------|
|                           | PSNR(dB)      | SSIM         | LPIPS        | Acc(%)       | Noise                        | Blur         | Rotation     | Crop         |
| GaussianMarker            | 29.18         | 0.893        | 0.108        | 85.71        | 84.83                        | 83.45        | 84.63        | 80.28        |
| 3D-GSW                    | 30.52         | 0.865        | 0.113        | 82.36        | 81.94                        | 80.74        | 83.18        | 81.35        |
| StegaNeRF+3DGS            | 28.64         | 0.851        | 0.119        | 88.80        | 51.73                        | 71.82        | 63.19        | 70.46        |
| HiDDeN+3DGS               | 27.32         | 0.847        | 0.154        | 48.65        | 47.31                        | 47.54        | 46.79        | 45.86        |
| <b>Robust3DGSW (Ours)</b> | <b>34.67</b>  | <b>0.945</b> | <b>0.094</b> | <b>92.48</b> | <b>87.27</b>                 | <b>87.18</b> | <b>87.43</b> | <b>88.06</b> |

Table 5. Performance comparison (with 8-bit quantization).

| Methods                   | No Distortion |              |              |              | Distortions (Bit Accuracy %) |              |              |              |
|---------------------------|---------------|--------------|--------------|--------------|------------------------------|--------------|--------------|--------------|
|                           | PSNR(dB)      | SSIM         | LPIPS        | Acc(%)       | Noise                        | Blur         | Rotation     | Crop         |
| GaussianMarker            | 20.64         | 0.841        | 0.211        | 75.84        | 71.93                        | 69.27        | 67.15        | 68.42        |
| 3D-GSW                    | 21.64         | 0.855        | 0.190        | 77.90        | 66.14                        | 70.83        | 67.59        | 69.76        |
| StegaNeRF+3DGS            | 17.32         | 0.724        | 0.297        | 73.22        | 46.85                        | 59.17        | 55.94        | 60.23        |
| HiDDeN+3DGS               | 16.24         | 0.716        | 0.348        | 46.52        | 45.87                        | 45.28        | 45.73        | 45.94        |
| <b>Robust3DGSW (Ours)</b> | <b>34.32</b>  | <b>0.924</b> | <b>0.095</b> | <b>89.36</b> | <b>81.63</b>                 | <b>81.48</b> | <b>82.79</b> | <b>84.14</b> |

At 16-bit quantization, the performance of some baseline methods remains satisfactory. Notably, Robust3DGSW achieves a watermark extraction accuracy of 92.48% and a PSNR of 34.32 dB, outperforming all baseline methods. However, with 8-bit quantization, the baseline methods experience a significant decline in performance, whereas Robust3DGSW maintains strong results, with only a 3.12% drop in accuracy relative to 16-bit quantization. Even with 8-bit quantization and geometric distortion, Robust3DGSW achieves over 80% accuracy across all distortion types, performing particularly well with crop distortion, reaching 84.14%.

The baseline methods exhibit critical weaknesses: i) **GaussianMarker**: The spatial-domain watermarks are directly affected by rounding errors caused by quantization. ii) **3D-GSW**: High-frequency embeddings are preferentially removed at 8-bit precision. iii) **StegaNeRF+3DGS** and **HiDDeN+3DGS**: These methods, designed for full-precision NeRF models, do not incorporate quantization-aware optimization, resulting in failures under sub-8-bit quantization.
